# Supplementary material for: Implementation and Sustainability of an Enhanced Pulmonary Rehabilitation Program in a single centre
Source: Research Square preprint supplement (doi:10.21203/rs.3.rs-106900/v1), 2020-11-13
Supplement: Supplementary file 1 [file 6605eb9d0bc68ae72a077475.docx]

**Additional file 3: Surveys for patients and healthcare professionals**

**Survey questions for patients in the initial implementation phase (score from 1-10)**

- How satisfied were you with the amount of practical information used in the education sessions (e.g. demonstrations and practice)?
- How satisfied were you with the content of the education sessions?
- How satisfied were you with the content of the written materials given?
- How approachable was/were the healthcare professional(s) who delivered the education sessions?
- How accessible was the location of the education sessions (e.g. distance to walk, car parking facilities)?
- Comments

**Survey questions for HCP’s in the initial implementation phase (score from 1-10)**

- How satisfied were you with the introduction of the program that you received?
- How satisfied were you with the content of the education sessions that you were asked to teach
- how satisfied were you with the facilitator notes and resources provided for the education sessions
- how satisfied were you with the time allotted for your education session(s)
- How likely would you be to recommend the education program (content, resources, structure) to another pulmonary rehabilitation programs?
- Comments

**Survey for patients in the sustainability phase**

Satisfaction

1. In general, how satisfied are you with the **pulmonary rehabilitation program** (including lectures, group discussions, individual meetings with health care professionals and exercise sessions)? If not, please describe which part you are not satisfied with and if possible, provide some concrete suggestions for change.

| Very satisfied | Satisfied | Neutral | Not satisfied | Very unsatisfied |
| --- | --- | --- | --- | --- |
|  |  |  |  |  |

If not, please describe which part you are not satisfied with and if possible, provide some concrete suggestions for change.

What did you especially **like** about the **pulmonary rehabilitation program** (including lectures, group discussions, individual meetings with health care professionals and exercise sessions)? Was the program the right length for you?

Was there any part that you **disliked** about the **pulmonary rehabilitation program** (including lectures, group discussions, individual meetings with health care professionals and exercise sessions)?

2. How satisfied are you with the **group education sessions** of the program

| Very satisfied | Satisfied | Neutral | Not satisfied | Very unsatisfied |
| --- | --- | --- | --- | --- |
|  |  |  |  |  |

If not, please describe which part you are not satisfied with and if possible, provide some concrete suggestions for change.

What did you especially like about the **group education sessions**? Were the sessions the right length?

Was there any part of the **group education sessions** that you did not like or that wasnot informative or helpful for you?

Did you feel encouraged by the professionals to take part in group conversations during the education sessions?

3. How satisfied were you with the individual education sessions of the program?

| Very satisfied | Satisfied | Neutral | Not satisfied | Very unsatisfied |
| --- | --- | --- | --- | --- |
|  |  |  |  |  |

If not, please describe which part you are not satisfied with and if possible, provide some concrete suggestions for change.

4. How satisfied were you with the exercise sessions of the program?

| Very satisfied | Satisfied | Neutral | Not satisfied | Very unsatisfied |
| --- | --- | --- | --- | --- |
|  |  |  |  |  |

If not, please describe which part you are not satisfied with and if possible, provide some concrete suggestions for change.

5. How satisfied were you with the interaction with the professionals?

| Very satisfied | Satisfied | Neutral | Not satisfied | Very unsatisfied |
| --- | --- | --- | --- | --- |
|  |  |  |  |  |

If not, please describe which part you are not satisfied with and if possible, provide some concrete suggestions for change.

6. Was it easy for you to attend all scheduled appointments? If not, please tell us why.

7. Do you think this program will continue to attract new patients in the years to come? Why do you think it will or will not?

*Patient evaluation*

1. How long did it take for you to complete the tests and questionnaires required prior to participation in the PR program?

2. How long did it take for you to complete the tests and questionnaires required after participation in the PR program?

3. Were the questionnaires and tests easy to perform?

4. Did you receive proper guidance on how to complete the questionnaires and tests?

5. Do you think that, in general, the way the professionals evaluate the patients, is feasible and relevant? If not, please tell us why.

*Action plan and home exercise plan*

1. Do you have an action plan?

- Yes
- No

2. Did any of the health care professionals during the program discuss with you what to do when you have an exacerbation?

- Yes
- No (please proceed to question 4)

3. Please give a brief description of what to do when you have an exacerbation:

4. Do you have a plan for exercising at home?

- Yes
- No

5. Did any of the health care professionals during the program discuss home exercises with you?

- Yes
- No (You may skip the last question)

6. Please give a brief description of your home exercise plan:

**Survey for HCP’s in the sustainability phase (open-ended questions)**

*Professional qualifications and experience*

What are your professional qualifications?

Did you have any additional relevant training? (adult education or other) If so, please specify.

How many years of work experience do you have in pulmonary rehabilitation?

*Feasibility of data collection*

How long does it take for you to assess one patient in the Enhanced PR program? (please give the approximate time you spend assessing one patient pre and post program).

Is this time different from the time you used to spend with the old program?

Do you think that the assessment package (tests and questionnaires) in the Enhanced PR program is relevant and feasible to be administered?

Is there any particular test or questionnaire that you think is not relevant or feasible to be administered at the Montréal Chest Institute? If so, please specify if possible.

Did you face any barriers to administering the questionnaires and/or tests of the Enhanced PR program?

Do you see any issues with continuing to administer these questionnaires/tests in a long term at the Montréal Chest Institute?

Do you think that the assessment package would be an issue in other centres? Why? Why not?

*Other barriers for maintaining the program*

Did you at any point feel like or had to deviate from the Enhanced PR program? If so, please explain why.

Did you face any other barriers in working with the Enhanced PR program, besides the assessment package?

*Satisfaction*

In general, are you satisfied with the new program?

| Very satisfied | Satisfied | Neutral | Not satisfied | Very unsatisfied |
| --- | --- | --- | --- | --- |
|  |  |  |  |  |

If not, please describe which part you are not satisfied with and if possible, provide some concrete suggestions for change.
